# Supplementary material for: Understanding the reactivity and selectivity of Diels–Alder reactions involving furans
Source: Royal Society of Chemistry journal article supplement (doi:10.1039/d3ob01343j), 2023-01-01

## Supporting Information

# Understanding the reactivity and selectivity of Diels-Alder reactions involving furans

Tiago Vinicius Alves<sup>a\*</sup> and Israel Fernández<sup>b\*</sup>

<sup>a</sup> *Departamento de Físico-Química, Instituto de Química, Universidade Federal da Bahia, Salvador, 40170-115, Bahia, Brazil*

<sup>b</sup> *Departamento de Química Orgánica and Centro de Innovación en Química Avanzada (ORFEO-CINQA), Facultad de Ciencias Químicas, Universidad Complutense de Madrid, Ciudad Universitaria, 28040, Madrid, Spain.*

\*E-mail address: [tiagova@ufba.br](mailto:tiagova@ufba.br); [israel@quim.ucm.es](mailto:israel@quim.ucm.es)

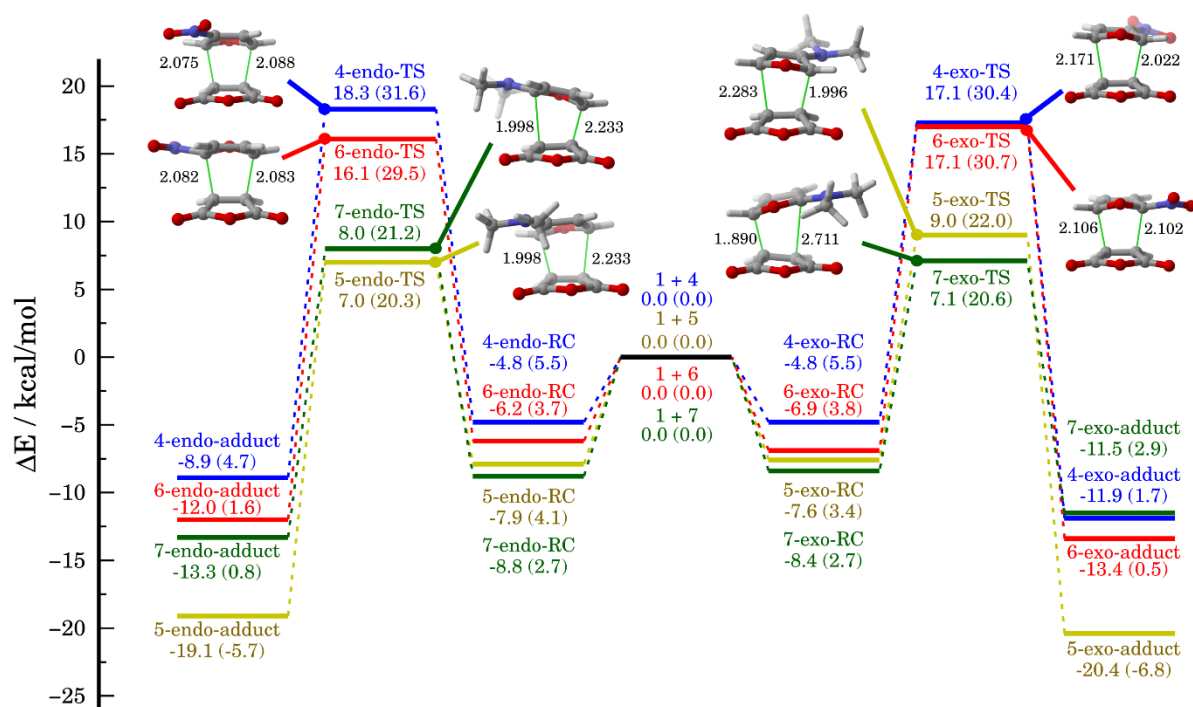

**Figure S1.** Relative energies of the stationary points, including the zero-point energies (in kcal/mol), on the potential energy surface for the **1 + 4** (blue), **1 + 5** (yellow), **1 + 6** (red), and **1 + 7** (green) reactions, calculated at DLPNO-CCSD(T)/def2-TZVPP//M06-2X/def2-TZVPP. Values within parentheses refer to relative free energy computed at the same level of theory. Bond distances in the corresponding transition states are given in angstroms.

**Table S1.** Computed activation energies (without zero-point energy correction) calculated at DLPNO-CCSD(T)/def2-TZVPP//M06-2X/def2-TZVPPa level of theory for the reactions between maleic anhydride (**1**), cyclopentadiene (**2**), furan (**3**), 3-nitrofurane (**4**), N,N-dimethylfuran-3-amine (**5**), 2-nitrofurane (**6**), and N,N-dimethylfuran-2-amine (**7**). All values are in kcal mol<sup>-1</sup>.

| Reactions    | endo pathway    |                                   |                                | exo pathway     |                                   |                                |
|--------------|-----------------|-----------------------------------|--------------------------------|-----------------|-----------------------------------|--------------------------------|
|              | ΔE <sup>‡</sup> | ΔE <sup>‡</sup> <sub>strain</sub> | ΔE <sup>‡</sup> <sub>int</sub> | ΔE <sup>‡</sup> | ΔE <sup>‡</sup> <sub>strain</sub> | ΔE <sup>‡</sup> <sub>int</sub> |
| <b>1 + 2</b> | 7.2             | 25.8                              | -18.6                          | 9.1             | 26.2                              | -17.1                          |
| <b>1 + 3</b> | 13.6            | 37.0                              | -23.4                          | 14.1            | 35.2                              | -21.1                          |
| <b>1 + 4</b> | 19.4            | 37.2                              | -17.8                          | 17.4            | 34.9                              | -17.5                          |
| <b>1 + 5</b> | 5.4             | 36.0                              | -30.6                          | 7.8             | 31.6                              | -23.7                          |
| <b>1 + 6</b> | 17.4            | 35.8                              | -18.4                          | 18.6            | 34.1                              | -15.5                          |
| <b>1 + 7</b> | 6.7             | 36.8                              | -30.2                          | 4.5             | 34.0                              | -29.5                          |

Cartesian coordinates at M06-2X/def2-TZVPP level of theory. The electronic energies, with zero-point energy correction, estimated at DLPNO-CCSD(T)/def2-TZVPP//M06-2X/def2-TZVPP.

**E = -378.670357404 ; 1-Maleic Anhydride**

|   |              |              |              |
|---|--------------|--------------|--------------|
| C | -0.000072000 | 0.162568000  | 1.121817000  |
| C | 0.000210000  | -1.256513000 | 0.661869000  |
| C | 0.000210000  | -1.256513000 | -0.661869000 |
| C | -0.000072000 | 0.162568000  | -1.121817000 |
| O | -0.000158000 | 0.963778000  | 0.000000000  |
| O | -0.000072000 | 0.598630000  | -2.221989000 |
| O | -0.000072000 | 0.598630000  | 2.221989000  |
| H | 0.000378000  | -2.080478000 | -1.356341000 |
| H | 0.000378000  | -2.080478000 | 1.356341000  |

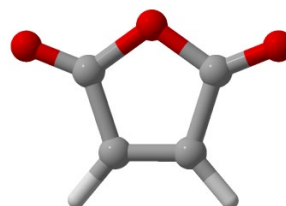

**E = -193.643459927 ; 2-Cyclopentadiene**

|   |              |              |              |
|---|--------------|--------------|--------------|
| C | -0.000009000 | 0.279771000  | 1.173529000  |
| C | -0.000009000 | -0.985482000 | 0.733681000  |
| C | -0.000009000 | -0.985482000 | -0.733681000 |
| C | -0.000009000 | 0.279771000  | -1.173529000 |
| C | 0.000023000  | 1.211946000  | 0.000000000  |
| H | -0.000012000 | -1.873977000 | 1.347924000  |
| H | -0.000012000 | -1.873977000 | -1.347924000 |
| H | -0.000011000 | 0.604776000  | -2.202713000 |
| H | -0.000011000 | 0.604776000  | 2.202713000  |
| H | -0.876499000 | 1.867675000  | 0.000000000  |
| H | 0.876615000  | 1.867585000  | 0.000000000  |

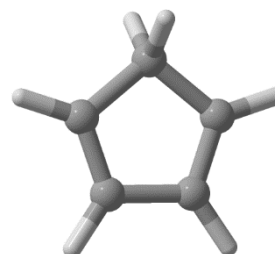

**E = -572.322683010 ; 2-endo-RC**

|   |              |              |              |
|---|--------------|--------------|--------------|
| C | -0.032117000 | -1.406918000 | 1.123199000  |
| C | -1.334019000 | -0.850836000 | 0.662677000  |
| C | -1.334019000 | -0.850836000 | -0.662677000 |
| C | -0.032117000 | -1.406918000 | -1.123199000 |
| O | 0.711159000  | -1.708513000 | 0.000000000  |
| O | 0.364365000  | -1.603855000 | -2.222121000 |
| O | 0.364365000  | -1.603855000 | 2.222121000  |
| C | -0.003157000 | 1.993798000  | 1.172609000  |
| C | 1.127264000  | 1.419039000  | 0.731518000  |
| C | 1.127264000  | 1.419039000  | -0.731518000 |
| C | -0.003157000 | 1.993798000  | -1.172609000 |
| C | -0.818588000 | 2.446232000  | 0.000000000  |
| H | 1.913007000  | 1.004267000  | 1.345868000  |
| H | 1.913007000  | 1.004267000  | -1.345868000 |
| H | -0.288157000 | 2.141706000  | -2.203300000 |
| H | -2.091939000 | -0.532186000 | -1.359242000 |
| H | -2.091939000 | -0.532186000 | 1.359242000  |
| H | -0.288157000 | 2.141706000  | 2.203300000  |
| H | -1.830068000 | 2.028768000  | 0.000000000  |
| H | -0.938988000 | 3.535057000  | 0.000000000  |

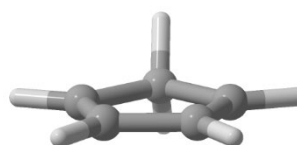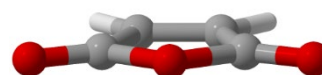

**E = -572.321564594 ; 2-exo-RC**

|   |              |              |              |
|---|--------------|--------------|--------------|
| C | 0.591814000  | 2.483962000  | 0.731439000  |
| C | 0.591814000  | 2.483962000  | -0.731439000 |
| C | -0.504484000 | 1.846856000  | -1.173333000 |
| C | 1.264245000  | -0.782938000 | -0.662766000 |
| C | 1.264245000  | -0.782938000 | 0.662766000  |
| C | -0.504484000 | 1.846856000  | 1.173333000  |
| C | -1.327853000 | 1.414267000  | 0.000000000  |
| C | 0.059467000  | -1.524722000 | 1.122974000  |
| C | 0.059467000  | -1.524722000 | -1.122974000 |
| O | -0.618714000 | -1.958821000 | 0.000000000  |
| O | -0.325739000 | -1.744515000 | 2.221599000  |
| O | -0.325739000 | -1.744515000 | -2.221599000 |
| H | 1.358508000  | 2.931977000  | 1.346740000  |
| H | 1.358508000  | 2.931977000  | -1.346740000 |
| H | -0.788713000 | 1.684634000  | -2.202020000 |
| H | 1.960878000  | -0.344525000 | -1.356925000 |
| H | 1.960878000  | -0.344525000 | 1.356925000  |
| H | -0.788713000 | 1.684634000  | 2.202020000  |
| H | -1.568786000 | 0.347442000  | 0.000000000  |
| H | -2.296409000 | 1.927689000  | 0.000000000  |

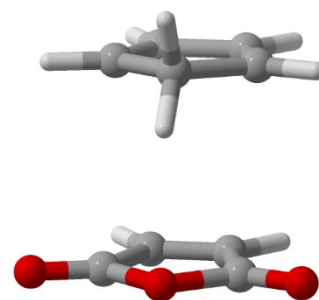

**E = -572.29927930 ; 2-endo-TS**

|   |              |              |              |
|---|--------------|--------------|--------------|
| C | -0.128524000 | -1.247275000 | 1.131291000  |
| C | -1.122064000 | -0.245592000 | 0.692657000  |
| C | -1.122064000 | -0.245592000 | -0.692657000 |
| C | -0.128524000 | -1.247275000 | -1.131291000 |
| O | 0.509974000  | -1.725391000 | 0.000000000  |
| O | 0.156777000  | -1.628418000 | -2.219759000 |
| O | 0.156777000  | -1.628418000 | 2.219759000  |
| C | -0.004025000 | 1.583201000  | 1.149423000  |
| C | 1.259444000  | 1.207519000  | 0.697467000  |
| C | 1.259444000  | 1.207519000  | -0.697467000 |
| C | -0.004025000 | 1.583201000  | -1.149423000 |
| C | -0.700747000 | 2.254648000  | 0.000000000  |
| H | 2.059973000  | 0.842601000  | 1.323330000  |
| H | 2.059973000  | 0.842601000  | -1.323330000 |
| H | -0.253633000 | 1.750027000  | -2.186936000 |
| H | -1.931973000 | 0.028652000  | -1.347542000 |
| H | -1.931973000 | 0.028652000  | 1.347542000  |
| H | -0.253633000 | 1.750027000  | 2.186936000  |
| H | -1.785547000 | 2.202404000  | 0.000000000  |
| H | -0.404910000 | 3.310729000  | 0.000000000  |

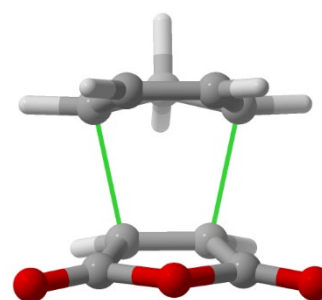

**E = -572.295647970 ; 2-exo-TS**

|   |              |              |              |
|---|--------------|--------------|--------------|
| C | 0.360006000  | 2.445978000  | 0.697567000  |
| C | 0.360006000  | 2.445978000  | -0.697567000 |
| C | -0.451504000 | 1.407760000  | -1.150683000 |
| C | 0.982263000  | -0.220102000 | -0.692502000 |
| C | 0.982263000  | -0.220102000 | 0.692502000  |
| C | -0.451504000 | 1.407760000  | 1.150683000  |
| C | -1.323779000 | 1.005923000  | 0.000000000  |
| C | 0.146180000  | -1.360690000 | 1.129555000  |
| C | 0.146180000  | -1.360690000 | -1.129555000 |
| O | -0.381591000 | -1.964650000 | 0.000000000  |
| O | -0.101272000 | -1.758262000 | 2.221313000  |
| O | -0.101272000 | -1.758262000 | -2.221313000 |
| H | 0.984623000  | 3.065522000  | 1.323716000  |
| H | 0.984623000  | 3.065522000  | -1.323716000 |
| H | -0.699688000 | 1.217252000  | -2.184823000 |
| H | 1.749469000  | 0.148565000  | -1.349536000 |
| H | 1.749469000  | 0.148565000  | 1.349536000  |
| H | -0.699688000 | 1.217252000  | 2.184823000  |
| H | -1.709829000 | -0.008249000 | 0.000000000  |
| H | -2.186575000 | 1.684079000  | 0.000000000  |

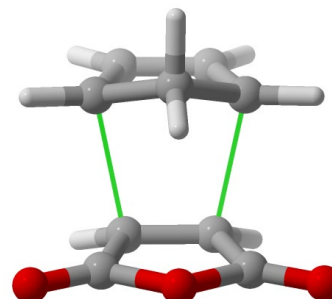

**E = -572.358425459 ; 2-endo-adduct**

|   |              |              |              |
|---|--------------|--------------|--------------|
| C | -0.135670000 | -1.214824000 | 1.141904000  |
| C | -0.884635000 | 0.040976000  | 0.766298000  |
| C | -0.884635000 | 0.040976000  | -0.766298000 |
| C | -0.135670000 | -1.214824000 | -1.141904000 |
| O | 0.254348000  | -1.880758000 | 0.000000000  |
| O | 0.130667000  | -1.627047000 | -2.220485000 |
| O | 0.130667000  | -1.627047000 | 2.220485000  |
| C | -0.128140000 | 1.365660000  | 1.126279000  |
| C | 1.304976000  | 1.183741000  | 0.665752000  |
| C | 1.304976000  | 1.183741000  | -0.665752000 |
| C | -0.128140000 | 1.365660000  | -1.126279000 |
| C | -0.669538000 | 2.266708000  | 0.000000000  |
| H | 2.138403000  | 0.977270000  | 1.320811000  |
| H | 2.138403000  | 0.977270000  | -1.320811000 |
| H | -0.274023000 | 1.684642000  | -2.152613000 |
| H | -1.873157000 | 0.020824000  | -1.220289000 |
| H | -1.873157000 | 0.020824000  | 1.220289000  |
| H | -0.274023000 | 1.684642000  | 2.152613000  |
| H | -1.757024000 | 2.352758000  | 0.000000000  |
| H | -0.212039000 | 3.253693000  | 0.000000000  |

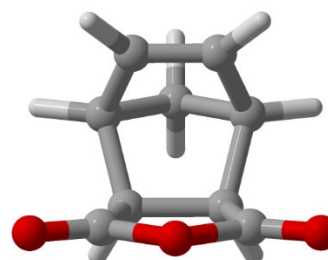

**E = -572.358781828 ; 2-exo-adduct**

|   |              |              |              |
|---|--------------|--------------|--------------|
| C | -0.356305000 | 2.453520000  | -0.665436000 |
| C | -0.356305000 | 2.453520000  | 0.665436000  |
| C | 0.322500000  | 1.176704000  | 1.124913000  |
| C | -0.685886000 | 0.034240000  | 0.767166000  |
| C | -0.685886000 | 0.034240000  | -0.767166000 |
| C | 0.322500000  | 1.176704000  | -1.124913000 |
| C | 1.358068000  | 0.998045000  | 0.000000000  |
| C | -0.146568000 | -1.328160000 | -1.140064000 |
| C | -0.146568000 | -1.328160000 | 1.140064000  |
| O | 0.143386000  | -2.047850000 | 0.000000000  |
| O | 0.048209000  | -1.775962000 | -2.219430000 |
| O | 0.048209000  | -1.775962000 | 2.219430000  |
| H | -0.834356000 | 3.165678000  | -1.321994000 |
| H | -0.834356000 | 3.165678000  | 1.321994000  |
| H | 0.671979000  | 1.139013000  | 2.151857000  |
| H | -1.652569000 | 0.177450000  | 1.243011000  |
| H | -1.652569000 | 0.177450000  | -1.243011000 |
| H | 0.671979000  | 1.139013000  | -2.151857000 |
| H | 1.851338000  | 0.023948000  | 0.000000000  |
| H | 2.106821000  | 1.786039000  | 0.000000000  |

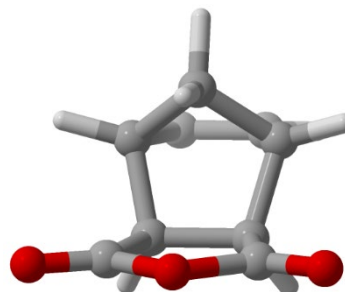

**E = -229.566161708 ; 3-Furan**

|   |              |              |              |
|---|--------------|--------------|--------------|
| C | 0.000053000  | -0.346575000 | 1.086968000  |
| C | 0.000053000  | 0.952968000  | 0.716115000  |
| C | 0.000053000  | 0.952968000  | -0.716115000 |
| C | 0.000053000  | -0.346575000 | -1.086968000 |
| O | -0.000196000 | -1.150465000 | 0.000000000  |
| H | 0.000101000  | 1.805425000  | 1.372172000  |
| H | 0.000101000  | 1.805425000  | -1.372172000 |
| H | 0.000050000  | -0.841922000 | -2.041016000 |
| H | 0.000050000  | -0.841922000 | 2.041016000  |

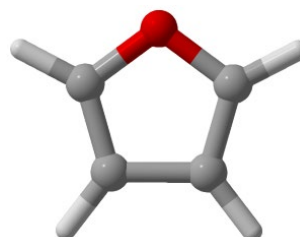

**E = -608.245694987 ; 3-endo-RC**  
 C -0.018752000 -1.398630000 1.122313000  
 C -1.314267000 -0.826840000 0.662554000  
 C -1.314267000 -0.826840000 -0.662554000  
 C -0.018752000 -1.398630000 -1.122313000  
 O 0.715547000 -1.721881000 0.000000000  
 O 0.381634000 -1.585707000 -2.221844000  
 O 0.381634000 -1.585707000 2.221844000  
 C -0.089699000 1.991911000 1.086833000  
 C 1.107745000 1.479849000 0.714193000  
 C 1.107745000 1.479849000 -0.714193000  
 C -0.089699000 1.991911000 -1.086833000  
 O -0.826167000 2.315459000 0.000000000  
 H 1.886386000 1.133214000 1.371240000  
 H 1.886386000 1.133214000 -1.371240000  
 H -0.538103000 2.195192000 -2.042992000  
 H -2.069043000 -0.494806000 -1.355910000  
 H -2.069043000 -0.494806000 1.355910000  
 H -0.538103000 2.195192000 2.042992000

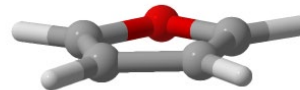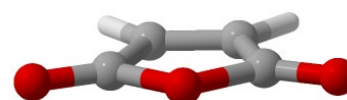

**E = -608.244994266 ; 3-exo-RC**  
 C 0.427426000 2.551746000 0.714471000  
 C 0.427426000 2.551746000 -0.714471000  
 C -0.534763000 1.675006000 -1.088542000  
 C 1.296235000 -0.758902000 -0.662540000  
 C 1.296235000 -0.758902000 0.662540000  
 C -0.534763000 1.675006000 1.088542000  
 O -1.131580000 1.139368000 0.000000000  
 C 0.062350000 -1.457380000 1.119565000  
 C 0.062350000 -1.457380000 -1.119565000  
 O -0.620518000 -1.878557000 0.000000000  
 O -0.331805000 -1.653921000 2.220349000  
 O -0.331805000 -1.653921000 -2.220349000  
 H 1.053159000 3.129815000 1.371696000  
 H 1.053159000 3.129815000 -1.371696000  
 H -0.905948000 1.342893000 -2.042204000  
 H 2.008132000 -0.347399000 -1.358079000  
 H 2.008132000 -0.347399000 1.358079000  
 H -0.905948000 1.342893000 2.042204000

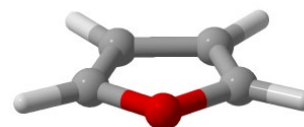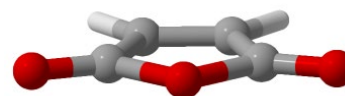

**E = -608.213362425 ; 3-endo-TS**

|   |              |              |              |
|---|--------------|--------------|--------------|
| C | -0.121361000 | 1.238404000  | 1.131516000  |
| C | -1.068968000 | -0.185994000 | 0.701173000  |
| C | -1.068968000 | -0.185994000 | -0.701173000 |
| C | -0.121361000 | -1.238404000 | -1.131516000 |
| O | 0.487105000  | -1.752728000 | 0.000000000  |
| O | 0.158282000  | -1.623473000 | -2.220017000 |
| O | 0.158282000  | -1.623473000 | 2.220017000  |
| C | -0.07452800  | 1.600561000  | 1.068834000  |
| C | 1.240969000  | 1.232717000  | 0.682588000  |
| C | 1.240969000  | 1.232717000  | -0.682588000 |
| C | -0.07452800  | 1.600561000  | -1.068834000 |
| O | -0.68840700  | 2.173928000  | 0.000000000  |
| H | 2.011559000  | 0.883192000  | 1.349097000  |
| H | 2.011559000  | 0.883192000  | -1.349097000 |
| H | -0.414529000 | 1.925185000  | -2.038465000 |
| H | -1.914741000 | 0.041323000  | -1.329366000 |
| H | -1.914741000 | 0.041323000  | 1.329366000  |
| H | -0.414529000 | 1.925185000  | 2.038465000  |

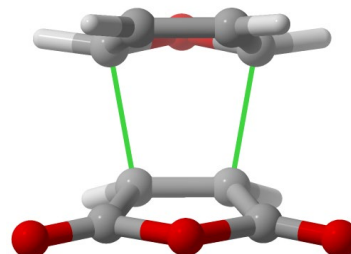

**E = -608.212562010 ; 3-exo-TS**

|   |              |              |              |
|---|--------------|--------------|--------------|
| C | 0.293377000  | 2.427978000  | 0.683062000  |
| C | 0.293377000  | 2.427978000  | -0.683062000 |
| C | -0.490141000 | 1.311138000  | -1.070073000 |
| C | 0.955444000  | -0.156301000 | -0.700541000 |
| C | 0.955444000  | -0.156301000 | 0.700541000  |
| C | -0.490141000 | 1.311138000  | 1.070073000  |
| O | -1.226514000 | 0.919356000  | 0.000000000  |
| C | 0.143547000  | -1.322746000 | 1.127872000  |
| C | 0.143547000  | -1.322746000 | -1.127872000 |
| O | -0.381715000 | -1.920834000 | 0.000000000  |
| O | -0.087618000 | -1.731153000 | 2.219417000  |
| O | -0.087618000 | -1.731153000 | -2.219417000 |
| H | 0.869366000  | 3.046330000  | 1.350628000  |
| H | 0.869366000  | 3.046330000  | -1.350628000 |
| H | -0.903502000 | 1.074986000  | -2.037766000 |
| H | 1.754637000  | 0.173402000  | -1.342232000 |
| H | 1.754637000  | 0.173402000  | 1.342232000  |
| H | -0.903502000 | 1.074986000  | 2.037766000  |

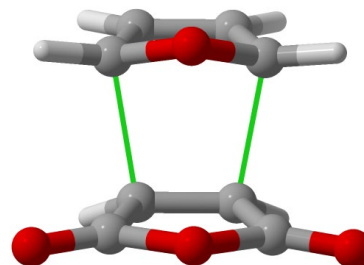



**E = -608.25413060 ; 3-endo-adduct**

|   |              |              |              |
|---|--------------|--------------|--------------|
| C | -0.122509000 | -1.201135000 | 1.141789000  |
| C | -0.902256000 | 0.033754000  | 0.763446000  |
| C | -0.902256000 | 0.033754000  | -0.763446000 |
| C | -0.122509000 | -1.201135000 | -1.141789000 |
| O | 0.289386000  | -1.854427000 | 0.000000000  |
| O | 0.151651000  | -1.604962000 | -2.221195000 |
| O | 0.151651000  | -1.604962000 | 2.221195000  |
| C | -0.169429000 | 1.393746000  | 1.065143000  |
| C | 1.283844000  | 1.216375000  | 0.663739000  |
| C | 1.283844000  | 1.216375000  | -0.663739000 |
| C | -0.169429000 | 1.393746000  | -1.065143000 |
| O | -0.683797000 | 2.181528000  | 0.000000000  |
| H | 2.101138000  | 1.025360000  | 1.341124000  |
| H | 2.101138000  | 1.025360000  | -1.341124000 |
| H | -0.388851000 | 1.830938000  | -2.031448000 |
| H | -1.885750000 | 0.018552000  | -1.224131000 |
| H | -1.885750000 | 0.018552000  | 1.224131000  |
| H | -0.388851000 | 1.830938000  | 2.031448000  |

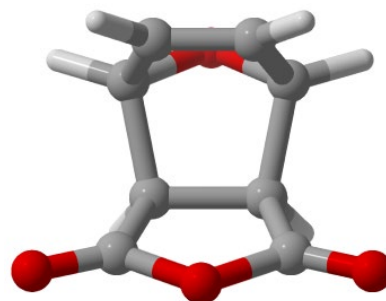

**E = -608.257060251 ; 3-exo-adduct**

|   |              |              |              |
|---|--------------|--------------|--------------|
| C | 0.297839000  | 2.464878000  | 0.663333000  |
| C | 0.297839000  | 2.464878000  | -0.663333000 |
| C | -0.359042000 | 1.156710000  | -1.065173000 |
| C | 0.693255000  | 0.036241000  | -0.765687000 |
| C | 0.693255000  | 0.036241000  | 0.765687000  |
| C | -0.359042000 | 1.156710000  | 1.065173000  |
| O | -1.275206000 | 0.937824000  | 0.000000000  |
| C | 0.137487000  | -1.320922000 | 1.136832000  |
| C | 0.137487000  | -1.320922000 | -1.136832000 |
| O | -0.160428000 | -2.034199000 | 0.000000000  |
| O | -0.052329000 | -1.762098000 | 2.219267000  |
| O | -0.052329000 | -1.762098000 | -2.219267000 |
| H | 0.741648000  | 3.176165000  | 1.341739000  |
| H | 0.741648000  | 3.176165000  | -1.341739000 |
| H | -0.843405000 | 1.086018000  | -2.032513000 |
| H | 1.645691000  | 0.198657000  | -1.260749000 |
| H | 1.645691000  | 0.198657000  | 1.260749000  |
| H | -0.843405000 | 1.086018000  | 2.032513000  |

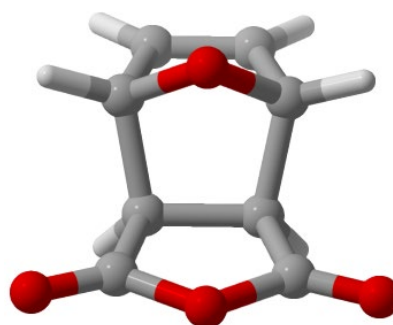

**E = -433.791539968 ; 4-3-Nitrofuran**

|   |              |              |              |
|---|--------------|--------------|--------------|
| O | -2.042388000 | -0.716039000 | 0.000567000  |
| C | -0.759412000 | -1.092924000 | -0.000285000 |
| C | 0.019052000  | 0.014917000  | 0.000057000  |
| C | -0.831664000 | 1.156653000  | 0.000089000  |
| C | -2.079230000 | 0.643809000  | -0.000408000 |
| N | 1.457462000  | 0.011641000  | -0.000031000 |
| H | -0.531785000 | 2.188552000  | -0.000015000 |
| H | -3.058449000 | 1.086104000  | -0.000834000 |
| H | -0.534590000 | -2.143526000 | -0.000571000 |
| O | 2.009390000  | 1.088736000  | 0.000142000  |
| O | 2.011762000  | -1.066116000 | -0.000095000 |

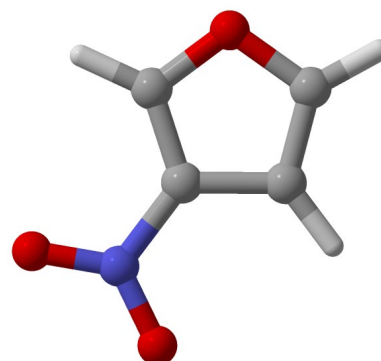

**E = -812.469487057 ; 4-endo-RC**

|   |              |              |              |
|---|--------------|--------------|--------------|
| O | -0.209173000 | 2.335237000  | -0.427827000 |
| C | -1.221438000 | 1.544357000  | -0.799040000 |
| C | -1.461800000 | 0.649677000  | 0.190062000  |
| C | -0.541775000 | 0.897401000  | 1.246693000  |
| C | 0.203528000  | 1.934657000  | 0.806789000  |
| C | 0.873824000  | -1.565957000 | -0.229593000 |
| C | 1.014170000  | -0.722937000 | -1.451814000 |
| C | 2.004002000  | 0.132419000  | -1.244400000 |
| C | 2.552565000  | -0.121654000 | 0.118020000  |
| O | 1.850441000  | -1.173400000 | 0.663229000  |
| O | 0.090131000  | -2.418885000 | 0.013056000  |
| O | 3.421025000  | 0.438258000  | 0.698302000  |
| N | -2.484601000 | -0.365513000 | 0.149367000  |
| H | -0.458279000 | 0.359765000  | 2.174341000  |
| H | 1.026417000  | 2.482516000  | 1.229710000  |
| H | 2.397352000  | 0.907710000  | -1.881354000 |
| H | 0.369172000  | -0.852523000 | -2.305927000 |
| H | -1.682792000 | 1.716712000  | -1.754230000 |
| O | -2.683269000 | -0.985150000 | 1.165464000  |
| O | -3.068920000 | -0.513981000 | -0.903275000 |

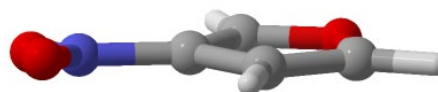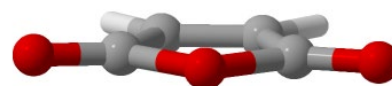

**E = -812.469561404 ; 4-exo-RC**

|   |              |              |              |
|---|--------------|--------------|--------------|
| O | 2.718278000  | 0.293696000  | 0.242512000  |
| C | 1.898000000  | 1.344290000  | -0.109909000 |
| C | 1.023599000  | 0.880633000  | -1.225444000 |
| C | 1.318310000  | -0.387158000 | -1.473318000 |
| C | 2.402978000  | -0.797709000 | -0.536948000 |
| O | 1.933327000  | 2.395689000  | 0.433985000  |
| O | 2.938948000  | -1.847382000 | -0.413946000 |
| C | -0.147466000 | -1.429830000 | 1.227739000  |
| C | -1.246280000 | -1.558054000 | 0.451127000  |
| C | -1.783596000 | -0.243869000 | 0.378645000  |
| C | -0.989120000 | 0.582078000  | 1.102880000  |
| O | 0.008753000  | -0.139678000 | 1.626982000  |
| N | -2.943992000 | 0.172047000  | -0.364171000 |
| H | -1.637903000 | -2.446590000 | -0.009938000 |
| H | 0.595636000  | -2.123516000 | 1.578923000  |
| H | 0.899916000  | -1.069195000 | -2.195175000 |
| H | 0.296700000  | 1.528886000  | -1.687935000 |
| H | -1.017798000 | 1.636585000  | 1.312012000  |
| O | -3.218876000 | 1.352185000  | -0.349777000 |
| O | -3.553825000 | -0.688607000 | -0.956922000 |

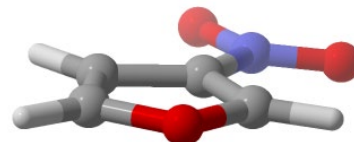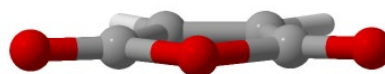

**E = -812.432780524 ; 4-endo-TS**

|   |              |              |              |
|---|--------------|--------------|--------------|
| O | 0.141984000  | 2.162599000  | -1.011944000 |
| C | -0.711620000 | 1.113390000  | -1.110506000 |
| C | -1.076319000 | 0.772625000  | 0.216664000  |
| C | -0.152373000 | 1.310010000  | 1.059455000  |
| C | 0.739609000  | 1.997829000  | 0.200816000  |
| C | 0.877448000  | -0.188599000 | -1.401571000 |
| C | 0.459636000  | -1.478887000 | -0.796333000 |
| O | 1.050044000  | -1.569036000 | 0.456137000  |
| C | 1.966908000  | -0.550462000 | 0.615222000  |
| C | 1.824389000  | 0.374204000  | -0.537574000 |
| O | -0.252955000 | -2.326543000 | -1.215069000 |
| O | 2.686608000  | -0.487504000 | 1.556683000  |
| N | -2.157035000 | -0.124823000 | 0.562310000  |
| H | -0.045220000 | 1.141832000  | 2.117826000  |
| H | 1.474255000  | 2.737691000  | 0.471489000  |
| H | 2.668444000  | 0.976690000  | -0.832015000 |
| H | 0.874690000  | -0.093675000 | -2.475573000 |
| H | -1.325789000 | 1.047731000  | -1.992645000 |
| O | -2.314737000 | -0.370190000 | 1.733591000  |
| O | -2.825094000 | -0.538972000 | -0.357183000 |

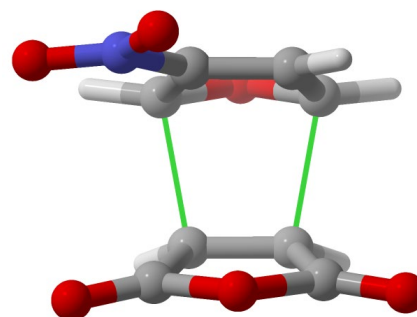

**E = -812.434607256 ; 4-exo-TS**  
 O 2.668323000 0.536309000 0.086794000  
 C 1.633374000 1.423803000 -0.113153000  
 C 0.496120000 0.683322000 -0.738276000  
 C 0.958804000 -0.615861000 -0.975028000  
 C 2.357184000 -0.681909000 -0.483439000  
 O 1.704644000 2.562024000 0.209225000  
 O 3.132924000 -1.579736000 -0.513188000  
 C 0.087387000 -1.581416000 0.763493000  
 C -1.213753000 -1.614501000 0.219377000  
 C -1.667474000 -0.336160000 0.357312000  
 C -0.624832000 0.440102000 0.927177000  
 O 0.233099000 -0.448987000 1.492685000  
 N -2.857501000 0.221256000 -0.230294000  
 H -1.683770000 -2.429896000 -0.303256000  
 H 0.744314000 -2.398844000 1.013037000  
 H 0.650330000 -1.282559000 -1.761950000  
 H -0.197348000 1.240199000 -1.349638000  
 H -0.696162000 1.415467000 1.381446000  
 O -2.922410000 1.431514000 -0.268096000  
 O -3.688545000 -0.550804000 -0.646465000

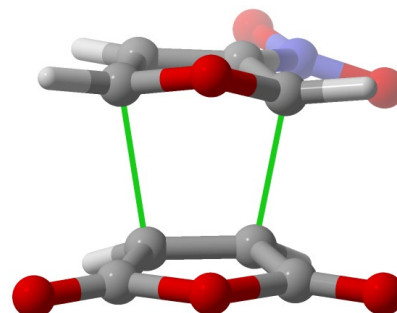

**E = -812.476049854 ; 4-endo-adduct**  
 O -0.075110000 -1.963612000 -1.309385000  
 C 0.544431000 -0.683958000 -1.292170000  
 C -0.734403000 0.229100000 -1.309212000  
 C -1.685124000 -0.581978000 -0.431186000  
 C -0.799259000 -1.834127000 -0.090551000  
 C -1.979598000 0.320334000 0.745021000  
 O -1.326367000 1.517703000 0.579778000  
 C -0.606518000 1.558742000 -0.601098000  
 C 1.097627000 -0.672296000 0.116063000  
 C 0.275336000 -1.373374000 0.880263000  
 O -0.006951000 2.521951000 -0.928892000  
 O -2.637063000 0.088955000 1.702383000  
 N 2.264165000 0.074525000 0.539162000  
 H 0.301930000 -1.507240000 1.949970000  
 H -1.343095000 -2.737776000 0.154134000  
 H -2.607184000 -0.892396000 -0.913884000  
 H -1.065295000 0.376994000 -2.332702000  
 H 1.242260000 -0.541122000 -2.106586000  
 O 2.602361000 -0.023003000 1.694059000  
 O 2.811538000 0.733656000 -0.316423000

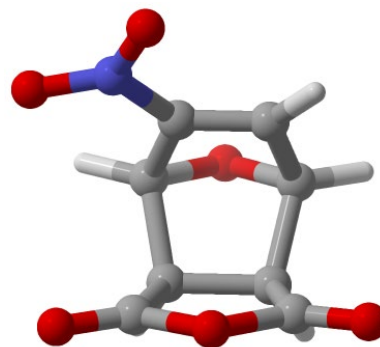

E = **-812.480901766** ; **4-exo-adduct**

|   |              |              |              |
|---|--------------|--------------|--------------|
| O | 2.761439000  | 0.588520000  | -0.068449000 |
| C | 1.674208000  | 1.431566000  | -0.110431000 |
| C | 0.434223000  | 0.654240000  | -0.505362000 |
| C | 0.935041000  | -0.782428000 | -0.682991000 |
| C | 2.418163000  | -0.701538000 | -0.382763000 |
| C | -0.515282000 | 0.492785000  | 0.722265000  |
| C | -1.685127000 | -0.331176000 | 0.231197000  |
| C | -1.266222000 | -1.576476000 | 0.073554000  |
| C | 0.192545000  | -1.511803000 | 0.488068000  |
| O | 0.186266000  | -0.487324000 | 1.475965000  |
| O | 1.762466000  | 2.581170000  | 0.149170000  |
| O | 3.207569000  | -1.583066000 | -0.385343000 |
| N | -2.948328000 | 0.223820000  | -0.193842000 |
| H | -1.794375000 | -2.412660000 | -0.355949000 |
| H | 0.669252000  | -2.416578000 | 0.847164000  |
| H | 0.774570000  | -1.247298000 | -1.651033000 |
| H | -0.050388000 | 1.125432000  | -1.355733000 |
| H | -0.720232000 | 1.393355000  | 1.288000000  |
| O | -2.991965000 | 1.433609000  | -0.271405000 |
| O | -3.846504000 | -0.540411000 | -0.452035000 |

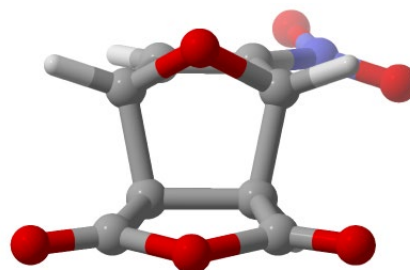

E= **-363.225795215** ; **5-N,N-dimethylfuran-3-amine**

|   |              |              |              |
|---|--------------|--------------|--------------|
| C | 2.204683000  | -0.610478000 | -0.018994000 |
| O | 2.144250000  | 0.718628000  | 0.173024000  |
| C | 0.829840000  | 1.071203000  | 0.114154000  |
| C | 0.059199000  | -0.022967000 | -0.134119000 |
| C | 0.973488000  | -1.130943000 | -0.212105000 |
| N | -1.320813000 | -0.073068000 | -0.324693000 |
| C | -1.987616000 | 1.188625000  | -0.093228000 |
| C | -1.986827000 | -1.197560000 | 0.306328000  |
| H | 0.741849000  | -2.164284000 | -0.400208000 |
| H | 3.185364000  | -1.051324000 | 0.005416000  |
| H | 0.610632000  | 2.113794000  | 0.247184000  |
| H | -3.045344000 | 1.085700000  | -0.328624000 |
| H | -1.889846000 | 1.527296000  | 0.949247000  |
| H | -1.562455000 | 1.951834000  | -0.744928000 |
| H | -3.025693000 | -1.223376000 | -0.019612000 |
| H | -1.516079000 | -2.130251000 | 0.004908000  |
| H | -1.963341000 | -1.134215000 | 1.403062000  |

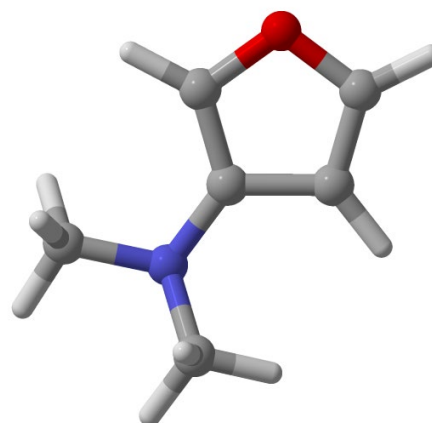

**E = -741.908671785 ; 5-endo-RC**  
O 1.259933000 -1.471158000 0.435664000  
C 0.620682000 -1.436749000 -0.783452000  
C 1.257810000 -0.371372000 -1.600213000  
C 2.223334000 0.177085000 -0.874172000  
C 2.249593000 -0.503993000 0.446552000  
O -0.267404000 -2.177817000 -1.053977000  
O 2.954230000 -0.330212000 1.383230000  
C -1.230583000 0.822716000 0.281247000  
C -1.004467000 1.506493000 -0.885196000  
O 0.034065000 2.376894000 -0.729906000  
C 0.498910000 2.212056000 0.519877000  
C -0.222054000 1.285251000 1.193793000  
N -2.242069000 -0.073052000 0.542478000  
C -3.039373000 -0.465567000 -0.598088000  
C -2.025689000 -1.077844000 1.566718000  
H -0.050669000 0.966407000 2.206739000  
H 1.336018000 2.824400000 0.806757000  
H 2.906276000 0.973060000 -1.119669000  
H 0.934886000 -0.153310000 -2.604047000  
H -1.507546000 1.525970000 -1.833714000  
H -3.850077000 -1.108310000 -0.261809000  
H -3.477467000 0.422442000 -1.057814000  
H -2.454542000 -1.003399000 -1.353842000  
H -2.984007000 -1.531648000 1.814385000  
H -1.334184000 -1.865932000 1.253885000  
H -1.639759000 -0.608438000 2.469303000

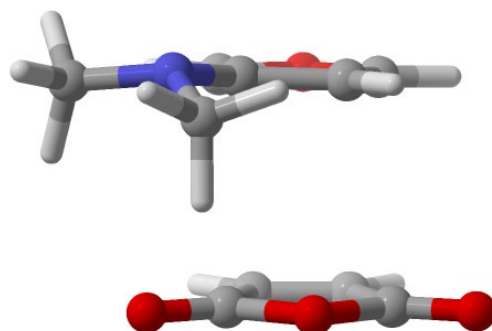

**E = -741.908233256 ; 5-exo-RC**  
O 0.231020000 -1.282710000 1.248670000  
C -0.151473000 -2.214516000 0.356175000  
C -1.242394000 -1.807472000 -0.332228000  
C -1.559796000 -0.498495000 0.166028000  
C -0.639110000 -0.242878000 1.140992000  
N -2.543776000 0.358263000 -0.315694000  
C -3.820799000 -0.264880000 -0.615663000  
C -2.662688000 1.597041000 0.427823000  
C 0.934444000 0.713225000 -1.263905000  
C 1.418307000 1.541988000 -0.126190000  
O 2.475984000 0.881224000 0.454437000  
C 2.699020000 -0.295369000 -0.236300000  
C 1.703642000 -0.363699000 -1.339707000  
O 1.025779000 2.590622000 0.269280000  
O 3.555289000 -1.056936000 0.063436000  
H -1.746761000 -2.358741000 -1.106195000  
H 0.437560000 -3.114505000 0.328894000  
H 1.668867000 -1.192210000 -2.026758000  
H 0.087320000 1.008359000 -1.862039000  
H -0.470593000 0.590472000 1.798118000  
H -3.389363000 2.240277000 -0.064512000  
H -2.987634000 1.428396000 1.464370000  
H -1.701391000 2.111448000 0.442853000  
H -4.452388000 0.454053000 -1.134926000  
H -3.676956000 -1.122002000 -1.269309000  
H -4.341618000 -0.600663000 0.290616000

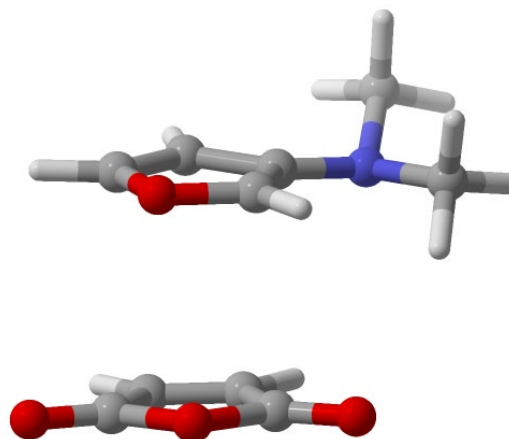

**E = -741.885051461 ; 5-endo-TS**  
 C 1.940006000 0.271816000 -0.670199000  
 C 0.793471000 0.012238000 -1.440823000  
 C 0.253929000 -1.282447000 -0.937579000  
 O 0.963958000 -1.644626000 0.172485000  
 C 2.072382000 -0.788949000 0.317223000  
 O -0.65446200 -1.939283000 -1.345797000  
 O 2.883573000 -1.000763000 1.160890000  
 C -0.511139000 1.403724000 -0.847225000  
 O 0.463225000 2.317586000 -0.559878000  
 C 1.002785000 1.857123000 0.593380000  
 C 0.052568000 1.117453000 1.304131000  
 C -0.968690000 0.844432000 0.401499000  
 N -2.074958000 0.090747000 0.563273000  
 C -3.014127000 -0.048274000 -0.533428000  
 C -2.111201000 -0.855235000 1.662462000  
 H 0.184174000 0.728518000 2.298554000  
 H 1.858058000 2.392498000 0.970487000  
 H 2.794862000 0.856106000 -0.963406000  
 H 0.708186000 0.209879000 -2.498523000  
 H -1.127027000 1.644928000 -1.698813000  
 H -3.231394000 0.933148000 -0.956182000  
 H -2.636989000 -0.707336000 -1.319022000  
 H -3.944496000 -0.457851000 -0.147545000  
 H -1.383378000 -1.659889000 1.523910000  
 H -1.900308000 -0.344956000 2.602780000  
 H -3.107235000 -1.284862000 1.726600000

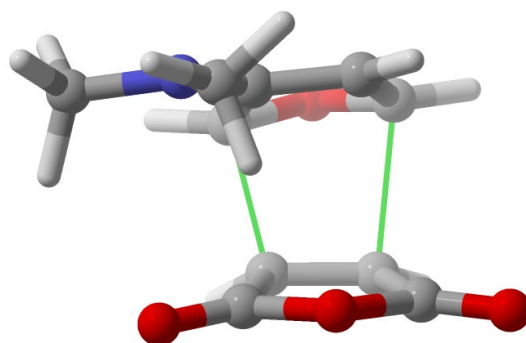



**E = -741.881760027 ; 5-exo-TS**  
O 0.331522000 -0.445474000 1.486549000  
C 0.147250000 -1.617482000 0.850958000  
C -1.137613000 -1.657214000 0.296097000  
C -1.587503000 -0.346194000 0.293488000  
C -0.515180000 0.419572000 0.859244000  
N -2.683521000 0.184082000 -0.318980000  
C -3.685600000 -0.744244000 -0.798630000  
C -3.148501000 1.485546000 0.124801000  
C 0.596321000 0.588427000 -0.789574000  
C 1.674948000 1.437700000 -0.198433000  
O 2.751582000 0.642485000 0.073372000  
C 2.522789000 -0.639880000 -0.438812000  
C 1.159675000 -0.680263000 -0.967668000  
O 1.656604000 2.601696000 0.051461000  
O 3.369452000 -1.474311000 -0.382683000  
H -1.592589000 -2.519476000 -0.158649000  
H 0.799817000 -2.425178000 1.139861000  
H 0.882219000 -1.428364000 -1.688068000  
H -0.116822000 1.062655000 -1.448582000  
H -0.567846000 1.403126000 1.298391000  
H -2.327041000 2.200383000 0.112831000  
H -3.907950000 1.842846000 -0.566753000  
H -3.575559000 1.455277000 1.133224000  
H -4.425825000 -0.199235000 -1.379541000  
H -3.222616000 -1.485221000 -1.448568000  
H -4.193934000 -1.266369000 0.020299000

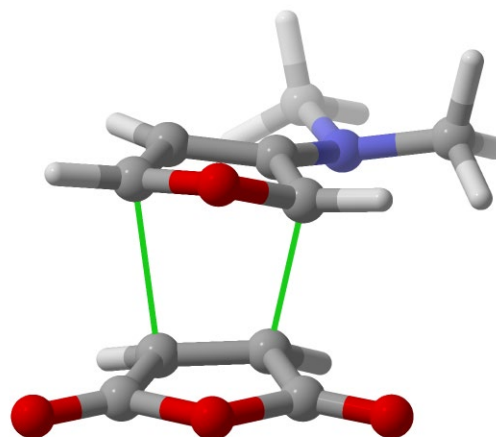

**E = -741.926600669 ; 5-endo-adduct**  
 C 0.091745000 -1.282172000 1.053804000  
 C -1.020738000 -1.777193000 0.163526000  
 O -0.322984000 -2.151165000 -1.024885000  
 C 0.402556000 -0.949716000 -1.182820000  
 C 0.979884000 -0.718745000 0.212629000  
 C -1.809353000 -0.524541000 -0.385126000  
 C -0.783846000 0.066702000 -1.350867000  
 C -2.015256000 0.558444000 0.644039000  
 O -1.217559000 1.647140000 0.340293000  
 C -0.504353000 1.449998000 -0.819034000  
 O -2.716860000 0.558546000 1.598165000  
 O 0.207642000 2.286704000 -1.265852000  
 N 2.043051000 0.089635000 0.461720000  
 C 3.081712000 0.266545000 -0.533295000  
 C 2.399071000 0.274490000 1.850414000  
 H 0.065420000 -1.254306000 2.129729000  
 H -1.648501000 -2.583162000 0.524601000  
 H -2.756264000 -0.809932000 -0.835558000  
 H -1.098892000 0.114470000 -2.389149000  
 H 1.085108000 -1.005037000 -2.022297000  
 H 3.686481000 1.127042000 -0.255688000  
 H 3.736140000 -0.607409000 -0.622755000  
 H 2.638872000 0.483298000 -1.503329000  
 H 3.170124000 1.037237000 1.926523000  
 H 1.522670000 0.609232000 2.406596000  
 H 2.767044000 -0.651543000 2.307895000

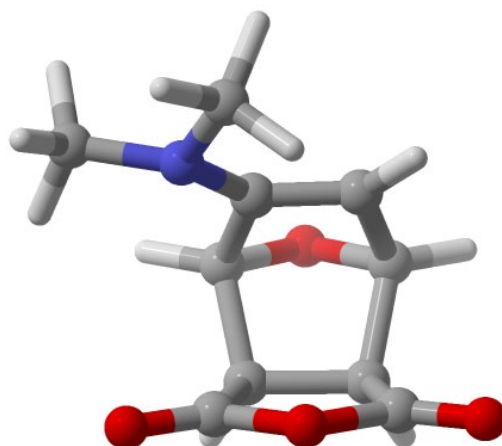

**E = -741.928699227 ; 5-exo-adduct**

|   |              |              |              |
|---|--------------|--------------|--------------|
| O | 0.275971000  | -0.369654000 | 1.477695000  |
| C | -0.420914000 | 0.521610000  | 0.629915000  |
| C | 0.544907000  | 0.583928000  | -0.598561000 |
| C | 1.087589000  | -0.847946000 | -0.615977000 |
| C | 0.294392000  | -1.480478000 | 0.579149000  |
| C | 2.552216000  | -0.692243000 | -0.277256000 |
| O | 2.853573000  | 0.638818000  | -0.088286000 |
| C | 1.750061000  | 1.435284000  | -0.269447000 |
| C | -1.606946000 | -0.319369000 | 0.163826000  |
| C | -1.150830000 | -1.582668000 | 0.154763000  |
| O | 1.802122000  | 2.613473000  | -0.150078000 |
| O | 3.373713000  | -1.537344000 | -0.159603000 |
| N | -2.767647000 | 0.219692000  | -0.322970000 |
| C | -3.737622000 | -0.738996000 | -0.809256000 |
| C | -3.341949000 | 1.364118000  | 0.366088000  |
| H | -1.635258000 | -2.477423000 | -0.198041000 |
| H | 0.767893000  | -2.345723000 | 1.030014000  |
| H | 0.973262000  | -1.406795000 | -1.539431000 |
| H | 0.056898000  | 0.946358000  | -1.499006000 |
| H | -0.602345000 | 1.473118000  | 1.116502000  |
| H | -4.103302000 | 1.811402000  | -0.270234000 |
| H | -3.803747000 | 1.083494000  | 1.319615000  |
| H | -2.581021000 | 2.116596000  | 0.554524000  |
| H | -4.563741000 | -0.208430000 | -1.278013000 |
| H | -3.270444000 | -1.384976000 | -1.551391000 |
| H | -4.133129000 | -1.367249000 | -0.001041000 |

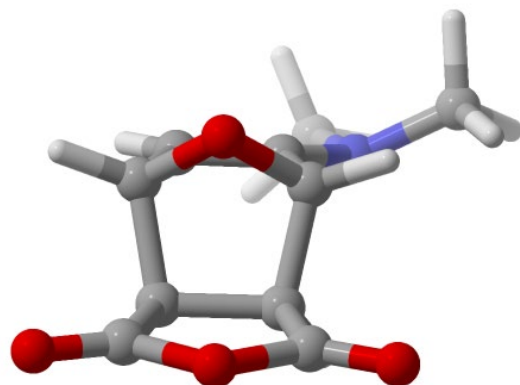

**E = -433.788601436 ; 6-2-Nitrofuran**

|   |              |              |              |
|---|--------------|--------------|--------------|
| O | -0.693059000 | -1.062206000 | 0.000030000  |
| C | -0.007726000 | 0.085959000  | -0.000161000 |
| C | -0.815510000 | 1.170444000  | -0.000007000 |
| C | -2.135310000 | 0.635808000  | 0.000102000  |
| C | -1.995368000 | -0.714102000 | -0.000006000 |
| H | -0.496896000 | 2.197013000  | -0.000054000 |
| H | -3.061563000 | 1.182272000  | 0.000163000  |
| H | -2.696831000 | -1.528869000 | -0.000029000 |
| N | 1.425885000  | -0.003094000 | -0.000400000 |
| O | 1.922395000  | -1.103582000 | 0.000187000  |
| O | 2.020361000  | 1.053611000  | 0.000177000  |

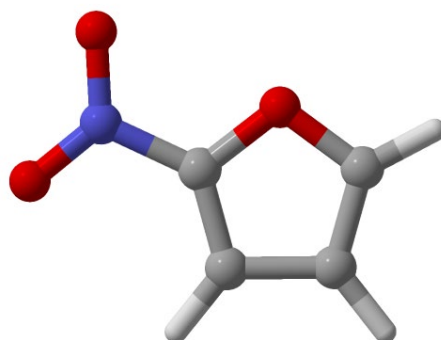

**E = -812.468763309 ; 6-endo-RC**  
 O 1.087846000 1.506508000 -0.191384000  
 C 1.609440000 0.306497000 -0.462103000  
 C 1.030142000 -0.282786000 -1.534674000  
 C 0.047506000 0.652219000 -1.968703000  
 C 0.129816000 1.710358000 -1.120933000  
 C -1.639149000 -1.433979000 -0.010387000  
 C -0.764650000 -1.046185000 1.133514000  
 C -1.123460000 0.166339000 1.528844000  
 C -2.251739000 0.614798000 0.663724000  
 O -2.530457000 -0.403273000 -0.223311000  
 O -1.627572000 -2.414802000 -0.673904000  
 O -2.845455000 1.640224000 0.665004000  
 H 1.265392000 -1.253962000 -1.932360000  
 H -0.636090000 0.545675000 -2.792428000  
 H -0.401503000 2.643117000 -1.050929000  
 H -0.715500000 0.789086000 2.308456000  
 H 0.011227000 -1.697457000 1.504335000  
 N 2.595370000 -0.195875000 0.451995000  
 O 2.859043000 0.478275000 1.420046000  
 O 3.066777000 -1.279293000 0.181456000

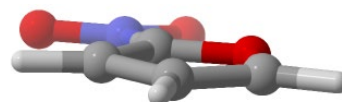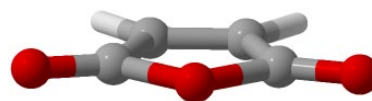

**E = -812.469961744 ; 6-exo-RC**  
 O 1.584012000 1.033450000 0.180797000  
 C 1.728886000 0.326833000 -0.998538000  
 C 1.763303000 -1.123036000 -0.651643000  
 C 1.656636000 -1.231937000 0.665049000  
 C 1.535438000 0.141328000 1.232049000  
 O 1.805172000 0.861123000 -2.051719000  
 O 1.410614000 0.490231000 2.357476000  
 C -1.432147000 1.961471000 -0.699408000  
 C -1.638096000 2.025748000 0.641711000  
 C -1.653634000 0.682146000 1.105485000  
 C -1.460708000 -0.065925000 -0.007611000  
 O -1.325736000 0.682977000 -1.109706000  
 H -1.767185000 0.311102000 2.108269000  
 H -1.746769000 2.919333000 1.229594000  
 H -1.327674000 2.706958000 -1.467132000  
 H 1.629448000 -2.111213000 1.287395000  
 H 1.848875000 -1.887712000 -1.405833000  
 N -1.327474000 -1.480810000 -0.162776000  
 O -1.150439000 -1.915627000 -1.277620000  
 O -1.366428000 -2.136224000 0.858843000

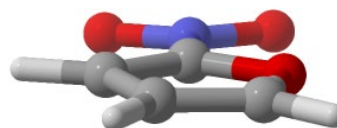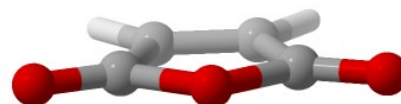

**E = -812.433345959 ; 6-endo-TS**

|   |              |              |              |
|---|--------------|--------------|--------------|
| O | 0.881847000  | -1.646113000 | -0.401793000 |
| C | 1.140861000  | -0.480407000 | 0.220353000  |
| C | 0.488212000  | -0.444051000 | 1.476390000  |
| C | -0.489298000 | -1.390517000 | 1.373637000  |
| C | -0.350010000 | -1.964366000 | 0.079554000  |
| C | -0.216289000 | 0.515287000  | -1.004540000 |
| C | -0.762654000 | 1.602336000  | -0.150113000 |
| O | -1.995929000 | 1.186983000  | 0.323453000  |
| C | -2.361867000 | 0.005458000  | -0.290554000 |
| C | -1.206142000 | -0.469222000 | -1.090878000 |
| O | -0.295240000 | 2.649069000  | 0.146958000  |
| O | -3.427453000 | -0.488724000 | -0.122403000 |
| H | 0.663911000  | 0.288271000  | 2.245519000  |
| H | -1.296488000 | -1.589807000 | 2.058621000  |
| H | -0.773966000 | -2.883612000 | -0.289310000 |
| H | -1.379378000 | -1.112775000 | -1.938078000 |
| H | 0.510573000  | 0.750214000  | -1.767676000 |
| N | 2.437407000  | 0.123973000  | -0.076558000 |
| O | 2.999627000  | -0.242900000 | -1.077620000 |
| O | 2.806726000  | 0.970785000  | 0.699372000  |

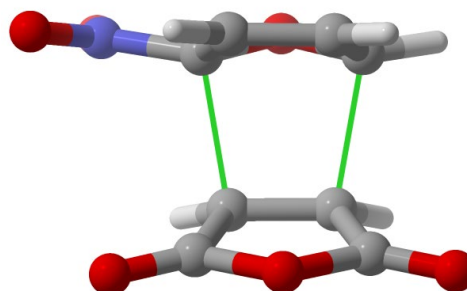

**E = -812.431650525 ; 6-exo-TS**

|   |              |              |              |
|---|--------------|--------------|--------------|
| O | 1.676250000  | -1.442219000 | -0.303910000 |
| C | 0.540700000  | -1.552853000 | 0.474437000  |
| C | 0.334101000  | -0.255411000 | 1.179525000  |
| C | 1.433927000  | 0.547538000  | 0.868135000  |
| C | 2.303645000  | -0.245465000 | -0.042865000 |
| O | -0.105111000 | -2.544422000 | 0.518999000  |
| O | 3.351543000  | 0.040322000  | -0.521680000 |
| C | 0.589173000  | 1.787651000  | -0.610153000 |
| C | -0.198565000 | 2.581369000  | 0.265128000  |
| C | -1.290624000 | 1.826382000  | 0.582080000  |
| C | -1.086739000 | 0.607461000  | -0.106535000 |
| O | -0.184457000 | 0.780291000  | -1.088644000 |
| H | -2.080722000 | 2.010986000  | 1.288760000  |
| H | 0.094125000  | 3.534098000  | 0.673172000  |
| H | 1.418696000  | 2.077643000  | -1.235161000 |
| H | 1.889391000  | 1.288406000  | 1.503037000  |
| H | -0.240227000 | -0.253076000 | 2.091297000  |
| N | -2.116822000 | -0.400258000 | -0.338292000 |
| O | -2.056902000 | -1.035948000 | -1.354916000 |
| O | -2.933474000 | -0.502560000 | 0.548703000  |

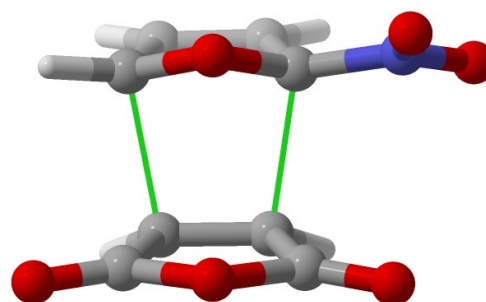

**E = -812.478125204 ; 6-endo-adduct**

|   |              |              |              |
|---|--------------|--------------|--------------|
| O | 0.849168000  | -1.634983000 | -0.501256000 |
| C | 0.992264000  | -0.354401000 | 0.054548000  |
| C | -0.046877000 | 0.449863000  | -0.792236000 |
| C | -1.148886000 | -0.599971000 | -0.920809000 |
| C | -0.520428000 | -1.802358000 | -0.124791000 |
| C | -2.350052000 | 0.034248000  | -0.259187000 |
| O | -2.014892000 | 1.289517000  | 0.199365000  |
| C | -0.697417000 | 1.599015000  | -0.056395000 |
| C | 0.473393000  | -0.514377000 | 1.463171000  |
| C | -0.491136000 | -1.418986000 | 1.345051000  |
| O | -0.211197000 | 2.618095000  | 0.294496000  |
| O | -3.431116000 | -0.420494000 | -0.102555000 |
| H | 0.780234000  | 0.081832000  | 2.306157000  |
| H | -1.191594000 | -1.757727000 | 2.091808000  |
| H | -0.886531000 | -2.784097000 | -0.396750000 |
| H | -1.382877000 | -0.895161000 | -1.939324000 |
| H | 0.409144000  | 0.773156000  | -1.724051000 |
| N | 2.408117000  | 0.116921000  | -0.116098000 |
| O | 3.013527000  | 0.400029000  | 0.885420000  |
| O | 2.813216000  | 0.173504000  | -1.248128000 |

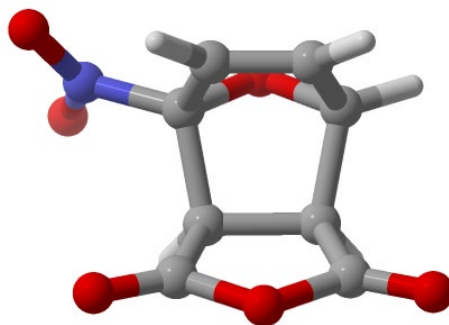

**E = -812.480318553 ; 6-exo-adduct**

|   |              |              |              |
|---|--------------|--------------|--------------|
| O | -1.792087000 | -1.490954000 | 0.101946000  |
| C | -0.531248000 | -1.553246000 | -0.440779000 |
| C | -0.116969000 | -0.178868000 | -0.939096000 |
| C | -1.319106000 | 0.714078000  | -0.616929000 |
| C | -2.313389000 | -0.223370000 | 0.037778000  |
| C | 0.945871000  | 0.473100000  | 0.003192000  |
| C | 1.308370000  | 1.821624000  | -0.583039000 |
| C | 0.261911000  | 2.584579000  | -0.300044000 |
| C | -0.706710000 | 1.685689000  | 0.447576000  |
| O | 0.179275000  | 0.789369000  | 1.127150000  |
| O | 0.090047000  | -2.556758000 | -0.485654000 |
| O | -3.385142000 | 0.041757000  | 0.462658000  |
| H | 2.190501000  | 2.013173000  | -1.171259000 |
| H | 0.065502000  | 3.601305000  | -0.600762000 |
| H | -1.418659000 | 2.129608000  | 1.133300000  |
| H | -1.783429000 | 1.230994000  | -1.450994000 |
| H | 0.217815000  | -0.231934000 | -1.969696000 |
| N | 2.095488000  | -0.426298000 | 0.319873000  |
| O | 2.150574000  | -0.913097000 | 1.412140000  |
| O | 2.868266000  | -0.582890000 | -0.597197000 |

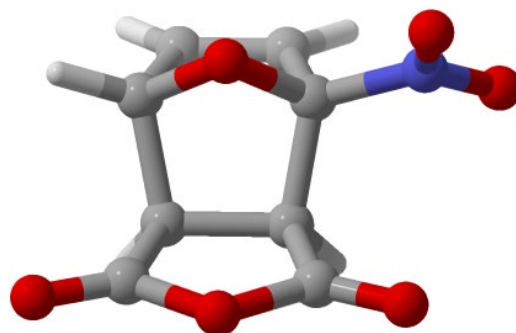

**E= -363.232426609 ; 7-N,N-dimethylfuran-2-amine**

|   |              |              |              |
|---|--------------|--------------|--------------|
| C | 2.133753000  | -0.680104000 | -0.050106000 |
| O | 0.825330000  | -1.040759000 | -0.210302000 |
| C | 0.085685000  | 0.082925000  | -0.098554000 |
| C | 0.884859000  | 1.159660000  | 0.138376000  |
| C | 2.225751000  | 0.646872000  | 0.156895000  |
| N | -1.271879000 | -0.052739000 | -0.295632000 |
| C | -2.013294000 | 1.172790000  | -0.093689000 |
| C | -1.890865000 | -1.228939000 | 0.295264000  |
| H | 0.569037000  | 2.176390000  | 0.284159000  |
| H | 3.132675000  | 1.203966000  | 0.315359000  |
| H | 2.849341000  | -1.479375000 | -0.102268000 |
| H | -3.051333000 | 1.006556000  | -0.374859000 |
| H | -1.980114000 | 1.512696000  | 0.950658000  |
| H | -1.603661000 | 1.957638000  | -0.727779000 |
| H | -2.898188000 | -1.330475000 | -0.104816000 |
| H | -1.321668000 | -2.115703000 | 0.033407000  |
| H | -1.950905000 | -1.155679000 | 1.388868000  |

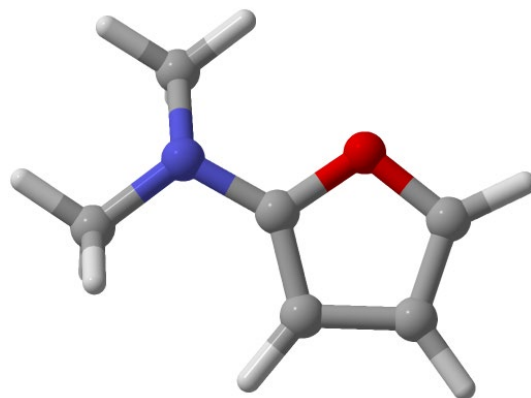

**E = -741.916864110 ; 7-endo-RC**

|   |              |              |              |
|---|--------------|--------------|--------------|
| O | 2.346954000  | 0.917978000  | -0.456711000 |
| C | 1.252964000  | 1.559470000  | 0.080061000  |
| C | 0.801687000  | 0.775340000  | 1.260735000  |
| C | 1.613980000  | -0.263614000 | 1.394370000  |
| C | 2.619862000  | -0.205206000 | 0.299918000  |
| O | 0.819251000  | 2.567199000  | -0.374291000 |
| O | 3.520799000  | -0.934156000 | 0.052161000  |
| C | -0.621028000 | -0.356502000 | -1.384429000 |
| C | -1.407019000 | -0.486742000 | -0.275670000 |
| O | -1.098196000 | -1.620476000 | 0.390573000  |
| C | -0.079618000 | -2.224426000 | -0.292493000 |
| C | 0.247095000  | -1.494505000 | -1.379244000 |
| N | -2.363443000 | 0.322425000  | 0.295843000  |
| C | -2.654161000 | 1.515610000  | -0.477951000 |
| C | -3.542927000 | -0.352005000 | 0.820980000  |
| H | -0.649466000 | 0.444540000  | -2.101018000 |
| H | 1.016629000  | -1.729564000 | -2.094358000 |
| H | 0.266369000  | -3.159769000 | 0.107440000  |
| H | 1.608787000  | -1.058307000 | 2.121545000  |
| H | -0.063251000 | 1.061482000  | 1.836797000  |
| H | -3.324687000 | 2.149369000  | 0.098735000  |
| H | -1.732887000 | 2.065172000  | -0.665892000 |
| H | -3.132115000 | 1.277613000  | -1.437169000 |
| H | -4.101350000 | 0.351698000  | 1.435356000  |
| H | -4.195763000 | -0.714541000 | 0.017487000  |
| H | -3.243643000 | -1.193530000 | 1.438650000  |

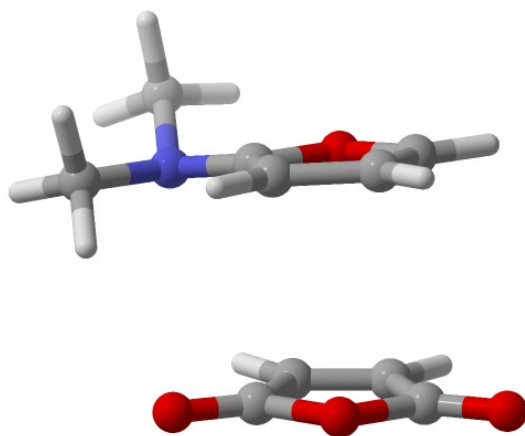

E = -741.916136674 ; 7-exo-RC

|   |              |              |              |
|---|--------------|--------------|--------------|
| O | -0.404290000 | 1.244428000  | -0.948211000 |
| C | -0.139707000 | 2.463119000  | -0.374700000 |
| C | -0.834034000 | 2.586367000  | 0.773813000  |
| C | -1.576769000 | 1.374328000  | 0.946835000  |
| C | -1.265210000 | 0.596431000  | -0.137733000 |
| N | -1.593306000 | -0.677639000 | -0.484192000 |
| C | -2.569184000 | -1.335548000 | 0.351458000  |
| C | -1.496752000 | -1.099518000 | -1.867646000 |
| C | 1.261897000  | -0.139777000 | 1.607614000  |
| C | 0.907646000  | -1.388973000 | 0.881325000  |
| O | 1.454681000  | -1.307660000 | -0.381004000 |
| C | 2.142495000  | -0.113998000 | -0.492265000 |
| C | 2.011791000  | 0.603464000  | 0.805246000  |
| O | 0.296767000  | -2.335569000 | 1.253171000  |
| O | 2.714138000  | 0.199309000  | -1.481537000 |
| H | -2.261975000 | 1.128138000  | 1.737112000  |
| H | -0.831647000 | 3.443424000  | 1.425123000  |
| H | 0.517469000  | 3.105520000  | -0.930990000 |
| H | 2.472214000  | 1.561303000  | 0.976954000  |
| H | 0.936965000  | 0.043135000  | 2.618030000  |
| H | -2.376513000 | -0.805625000 | -2.451209000 |
| H | -0.609061000 | -0.671005000 | -2.323582000 |
| H | -1.401537000 | -2.183739000 | -1.889208000 |
| H | -2.579402000 | -2.395049000 | 0.106263000  |
| H | -2.279510000 | -1.237984000 | 1.397697000  |
| H | -3.577278000 | -0.924084000 | 0.220119000  |

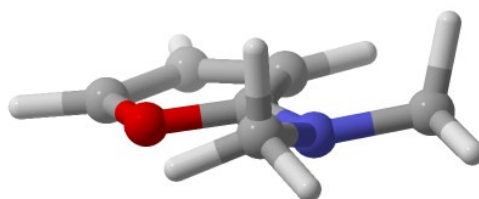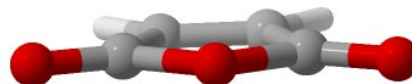



**E = -741.890096204 ; 7-endo-TS**  
 C -1.241050000 -0.562466000 -1.031402000  
 C -0.370613000 0.547425000 -1.074436000  
 C -0.928394000 1.602828000 -0.272382000  
 O -2.165131000 1.138887000 0.243980000  
 C -2.450770000 -0.080621000 -0.286240000  
 O -0.551548000 2.702796000 0.006680000  
 O -3.486727000 -0.641020000 -0.104804000  
 C 1.286661000 -0.602263000 0.391665000  
 O 0.844611000 -1.670718000 -0.275097000  
 C -0.487890000 -1.829197000 0.123256000  
 C -0.593604000 -1.220221000 1.411636000  
 C 0.454363000 -0.358066000 1.521482000  
 N 2.506474000 -0.121318000 0.110555000  
 C 2.848149000 1.161456000 0.708238000  
 C 3.076640000 -0.384880000 -1.198591000  
 H 0.613180000 0.401984000 2.265690000  
 H -1.459871000 -1.279298000 2.049805000  
 H -0.900207000 -2.790167000 -0.141929000  
 H -1.428269000 -1.203989000 -1.881994000  
 H 0.413133000 0.736582000 -1.786835000  
 H 2.692891000 0.319315000 -1.944296000  
 H 4.156869000 -0.274880000 -1.135345000  
 H 2.840673000 -1.397003000 -1.510149000  
 H 3.893546000 1.370777000 0.497032000  
 H 2.222347000 1.962323000 0.301581000  
 H 2.719805000 1.120060000 1.787124000

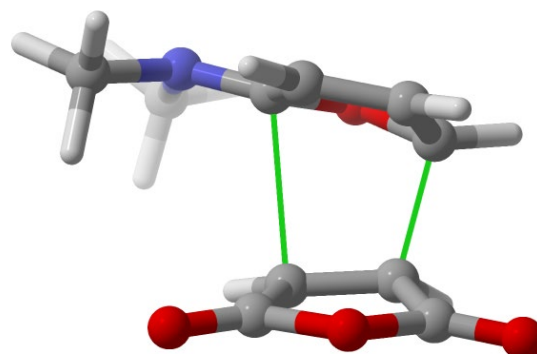

**E = -741.891445562 ; 7-exo-TS**  
O -0.021177000 0.801300000 1.093717000  
C -0.925884000 1.697823000 0.506468000  
C -0.144907000 2.565098000 -0.306159000  
C 1.049871000 1.942819000 -0.526238000  
C 1.065649000 0.800101000 0.329881000  
N 2.002501000 -0.107808000 0.547172000  
C 3.124655000 -0.194265000 -0.370207000  
C 1.799621000 -1.225669000 1.464248000  
C -0.715828000 -0.095845000 -1.506270000  
C -0.407351000 -1.358783000 -0.926374000  
O -1.326094000 -1.594054000 0.133873000  
C -2.183614000 -0.544720000 0.213745000  
C -1.722570000 0.525724000 -0.744412000  
O 0.455152000 -2.169046000 -1.135662000  
O -3.104753000 -0.511079000 0.968593000  
H 1.831394000 2.224191000 -1.208863000  
H -0.521721000 3.440180000 -0.809341000  
H -1.717130000 1.988572000 1.181072000  
H -2.498395000 1.160031000 -1.151303000  
H -0.262769000 0.239114000 -2.421498000  
H 2.513384000 -1.154951000 2.285935000  
H 0.788145000 -1.206317000 1.855561000  
H 1.939849000 -2.159137000 0.923958000  
H 3.496624000 0.798340000 -0.613874000  
H 3.923877000 -0.747388000 0.116898000  
H 2.826353000 -0.718638000 -1.281013000

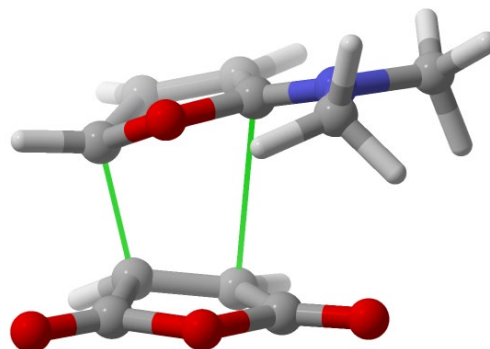

**E = -741.924011635 ; 7-endo-adduct**  
 C -0.492341000 -1.602046000 1.113989000  
 C -0.446140000 -1.756438000 -0.395596000  
 O 0.895983000 -1.432165000 -0.701252000  
 C 0.971790000 -0.197196000 0.061329000  
 C 0.375792000 -0.640321000 1.392082000  
 C -1.173924000 -0.499199000 -0.997486000  
 C -0.165806000 0.601125000 -0.687327000  
 C -2.426465000 -0.082583000 -0.266492000  
 O -2.207527000 1.113974000 0.378116000  
 C -0.923424000 1.581126000 0.173542000  
 N 2.246738000 0.395585000 0.112191000  
 C 2.751976000 0.937632000 -1.140786000  
 O -3.466117000 -0.647273000 -0.194593000  
 O -0.555528000 2.603855000 0.642253000  
 C 3.237664000 -0.452963000 0.764548000  
 H 0.572342000 -0.143796000 2.329934000  
 H -1.188740000 -2.097222000 1.772366000  
 H -0.745372000 -2.705624000 -0.823661000  
 H -1.381711000 -0.645137000 -2.053864000  
 H 0.229438000 1.101250000 -1.564589000  
 H 3.763364000 1.300229000 -0.968717000  
 H 2.786426000 0.189797000 -1.942082000  
 H 2.156431000 1.789351000 -1.461814000  
 H 4.124648000 0.141346000 0.977028000  
 H 2.844502000 -0.832627000 1.705216000  
 H 3.522286000 -1.308607000 0.141834000

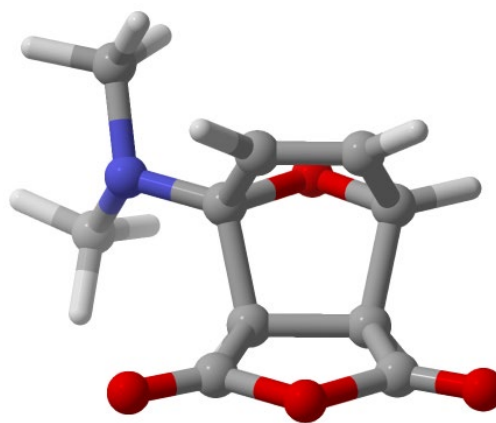

**E = -741.921058817 ; 7-exo-adduct**  
O 0.384645000 0.779637000 1.016725000  
C 0.984712000 0.255358000 -0.183777000  
C -0.320492000 -0.122418000 -1.023943000  
C -1.302640000 0.934460000 -0.514673000  
C -0.397397000 1.795759000 0.418694000  
C -2.290299000 0.142583000 0.316490000  
O -2.045753000 -1.201152000 0.175002000  
C -0.989515000 -1.430113000 -0.685804000  
C 1.444685000 1.539250000 -0.870053000  
C 0.599146000 2.486301000 -0.491207000  
O -0.740243000 -2.519823000 -1.076245000  
O -3.160133000 0.553875000 1.007269000  
N 1.946534000 -0.753422000 0.044355000  
C 3.291005000 -0.252078000 0.310633000  
C 1.573337000 -1.711998000 1.083285000  
H 2.226743000 1.592451000 -1.610177000  
H 0.535101000 3.507313000 -0.833103000  
H -0.934515000 2.381753000 1.156225000  
H -1.828773000 1.513223000 -1.269375000  
H -0.091560000 -0.115150000 -2.084522000  
H 2.221696000 -2.582480000 1.000882000  
H 1.682197000 -1.277347000 2.082728000  
H 0.549711000 -2.050051000 0.973032000  
H 3.947121000 -1.108298000 0.456804000  
H 3.671707000 0.316181000 -0.533650000  
H 3.331456000 0.373453000 1.210804000

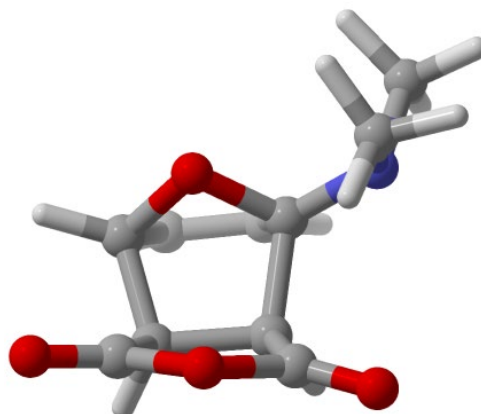

Supplement: d3ob01343j1.pdf [file d3ob01343j1.pdf]
